# Supplementary material
Source: Frontiers journal article supplement (https://www.frontiersin.org/articles/474661)
Supplement: Table_1.XLSX [file Table_1.XLSX]

## Sheet: Sheet1
Response variable	Model parameters	Farm type (FT)		Proportion of agricultural land (PAL)		Interaction		ΔAICc	w
Abundance
squash bee	FT	2.126 ± 0.541	***					0	0.506
	FT x PAL	– 4.756 ± 2.837	*	– 2.582 ± 2.374		8.122 ± 3.427	**	0.849	0.331
	FT + PAL	2.034 ± 0.567	***	0.930 ± 2.216				2.483	0.146
	Null							7.615	0.011
	PAL			3.416 ± 3.497				9.205	0.005
wild bee	FT + PAL	1.488 ± 0.745	**	6.356 ± 3.442	**			0	0.287
	FT	1.832 ± 0.837	**					0.437	0.23
	PAL			8.081 ± 4.012	**			0.496	0.224
	FT x PAL	– 4.969 ± 5.347		2.173 ± 4.429		7.616 ± 6.255		1.447	0.139
	Null							1.73	0.121
honey bee	Null							0	0.373
	PAL			– 4.079 ± 2.586				0.19	0.339
	FT	– 0.119 ± 0.670						2.429	0.111
	FT + PAL	0.181 ± 0.611		– 4.292 ± 2.664				2.753	0.094
	FT x PAL	7.067 ± 4.031		– 1.221 ± 2.857		– 8.229 ± 4.792		2.992	0.084
total bee	FT	0.839 ± 0.217	***					0	0.635
	FT + PAL	0.906 ± 0.219	***	– 0.895 ± 0.927				1.759	0.264
	FT + PAL	0.872 ± 1.584		– 0.912 ± 1.209		0.041 ± 1.885		4.62	0.063
	Null							6.168	0.029
	PAL			0.234 ± 1.560				8.606	0.009
Diversity
richness	Null							0	0.564
	PAL			0.426 ± 0.366				1.476	0.27
	FT	0.137 ± 0.084						3.243	0.112
	FT + PAL	0.115 ± 0.091		0.274 ± 0.374				5.71	0.032
	FT x PAL	– 0.525 ± 0.659		0.00 ± 0.466		0.764 ± 0.778		6.51	0.022
shannon	Null							0	0.663
	PAL			0.192 ± 0.297				2.849	0.16
	FT	0.112 ± 0.057	*					3.03	0.146
	FT + PAL	0.109 ± 0.065		0.052 ± 0.277				6.663	0.024
	FT x PAL	0.055 ± 0.537		0.027 ± 0.383		0.066 ± 0.635		8.921	0.008
evenness	Null							0	0.615
	PAL			– 0.002 ± 0.638				1.784	0.252
	FT	0.103 ± 0.144						4.198	0.075
	FT + PAL	0.115 ± 0.162		– 0.148 ± 0.698				5.972	0.031
	FT x PAL	0.664 ± 1.324		0.088 ± 0.944		– 0.654 ± 1.565		6.228	0.027
