# Supplementary material
Source: Frontiers journal article supplement (https://www.frontiersin.org/articles/474661)
Supplement: Table_2.XLSX [file Table_2.XLSX]

## Sheet: squashEffects.ToD
Response variable	Model parameters	Time of day (TD)		Farm type (FT)		Interaction		ΔAICc	w
Abundance
squash bee	TD x FT	– 1.792 ± 0.748	**	1.741 ± 0.554	**	1.428 ± 0.764	*	0	0.672
	TD + FT	– 0.450 ± 0.151	**	2.112 ± 0.540	***			1.564	0.307
	TD	– 0.452 ± 0.151	**					7.909	0.013
	FT			2.126 ± 0.541	***			8.93	0.008
	Null							15.523	0
wild bee	TD	– 0.015 ± 0.124						0	0.636
	TD + FT	– 0.014 ± 0.124		2.016 ± 0.543	***			2.637	0.17
	TD x FT	– 0.773 ± 0.483		1.682 ± 0.568	**	0.817 ± 0.500		2.755	0.161
	Null							6.438	0.025
	FT			2.017 ± 0.543	***			8.885	0.007
honey bee	TD x FT	0.333 ± 0.198		– 1.286 ± 0.710	*	1.634 ± 0.277	***	0	1
	FT			– 0.119 ± 0.670				29.724	0
	TD + FT	1.322 ± 0.132	***	– 0.076 ± 0.678				32.361	0
	Null							147.568	0
	TD	1.322 ± 0.132	***					149.997	0
total bee	TD x FT	0.164 ± 0.181		0.461 ± 0.246	*	0.654 ± 0.206	**	0	0.969
	TD + FT	0.676 ± 0.086	***	0.861 ± 0.215	***			6.97	0.03
	FT			0.839 ± 0.217	***			13.323	0.001
	TD	0.674 ± 0.086	***					68.371	0
	Null							74.539	0
Diversity
richness	Null							0	0.798
	TD	– 0.020 ± 0.067						3.243	0.158
	FT			0.137 ± 0.084				6.145	0.037
	TD + FT	– 0.017 ± 0.067		0.136 ± 0.084				9.627	0.006
	TD x FT	0.000 ± 0.110		0.15 0± 0.109		– 0.029 ± 0.140		14.797	0
shannon	Null							0	0.809
	TD	– 0.004 ± 0.021						3.03	0.178
	FT			0.112 ± 0.057				8.558	0.011
	TD + FT	– 0.003 ± 0.021		0.112 ± 0.057				11.81	0.002
	TD x FT	0.000 ± 0.034		0.114 ± 0.061		– 0.005 ± 0.043		19.356	0
evenness	Null							0	0.864
	TD	0.014 ± 0.045						4.198	0.106
	FT			0.103 ± 0.144				6.924	0.027
	TD + FT	0.014 ± 0.045		0.103 ± 0.144				11.333	0.003
	TD x FT	0.000 ± 0.074		0.092 ± 0.151		0.023 ± 0.095		17.265	0
